# Supplementary material for: On the interface crystallography of heat induced self-welded TiO2 nanofibers grown by oriented attachment
Source: Royal Society of Chemistry journal article supplement (doi:10.1039/d0ce00392a), 2020-01-01
Supplement: d0ce00392a1.pdf [file d0ce00392a1.pdf]

# On the Interface Crystallography of Heat Induced Self-Welding TiO<sub>2</sub> Nanofibers Grown by Oriented Attachment

Xiaokai Shi<sup>a</sup>, Juanjuan Ma<sup>b</sup>, Lijian Zheng<sup>b</sup>, Xiuping Yue<sup>\*,a</sup> and Lijun Liu<sup>c</sup>

*a. College of Environmental Science and Engineering, Taiyuan University of Technology, Taiyuan, 030024, China.*

*b. College of Water Resource Science and Engineering, Taiyuan University of Technology, Taiyuan, 030024, China.*

*c. Shanxi Academy of Environmental Research, Taiyuan 030024, China.*

## Supplementary Materials

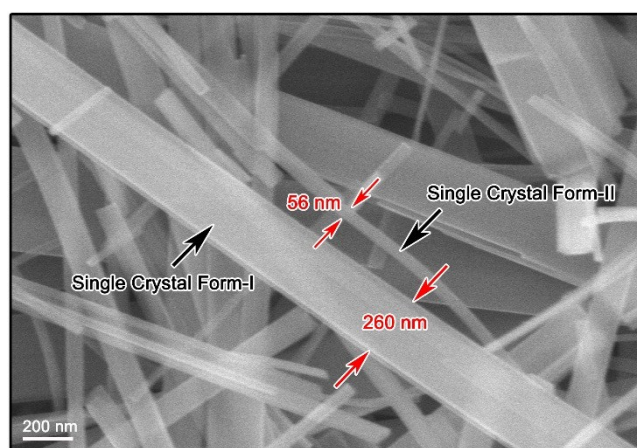

Fig. S1 The SEM image of the as synthesized H<sub>2</sub>Ti<sub>3</sub>O<sub>7</sub> nanofibers

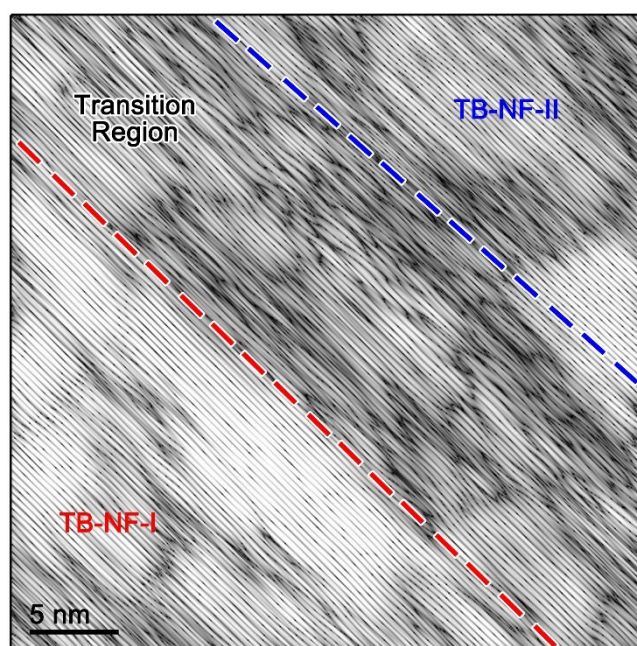

Fig. S2 The IFFT image of the TB-TB self-welded nanofibers with different SCFs

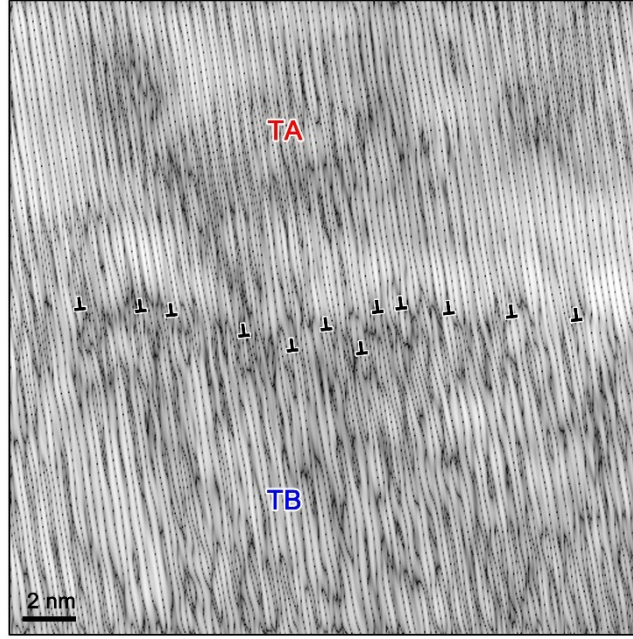

Fig. S3 The IFFT image of the TB-TA self-welded nanofibers with  $\{001\}$  SCF. The dislocations are mainly distributed on the TB nanofiber and interface.

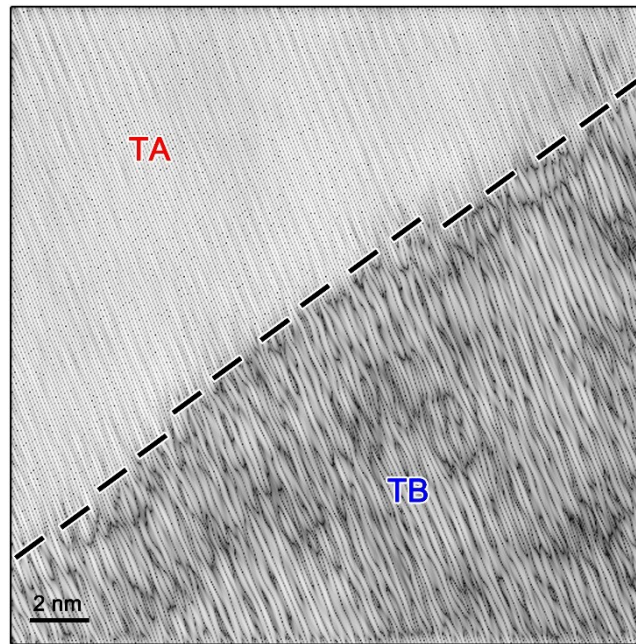

Fig. S4 The IFFT image of the TB-TA self-welded nanofibers with  $\{100\}$  SCF. There is almost no dislocation can be found at the TA side, which may be due to the similar atom distribution at  $(010)_{TB}$  and  $(010)_{TA}$  under the current orientation relationship.

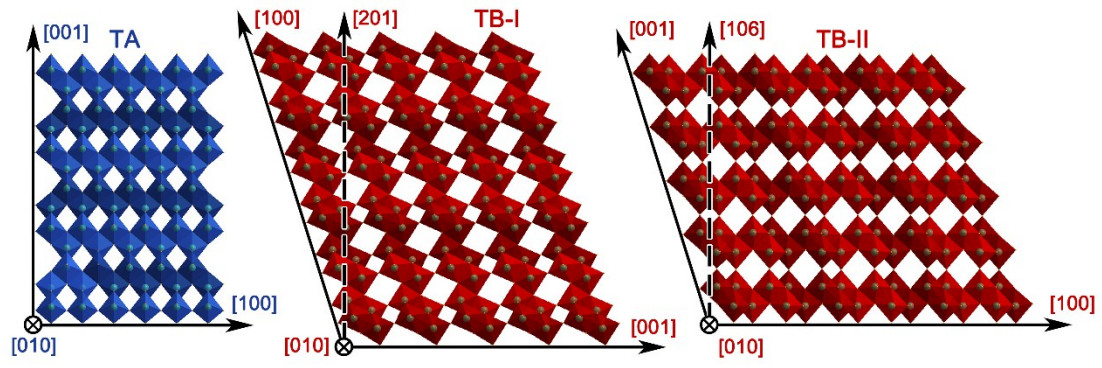

Fig. S5 The crystal models of TA and TB projected along  $[010]_{TB} // [010]_{TA}$ . The similar voids distribution between the crystals of TA and TB under the orientation relationship of  $[010]_{TB} // [010]_{TA}$ ,  $[100]_{TB} // [100]_{TA}$  and  $[106]_{TB} // [001]_{TA}$  may be the reason of lower dislocation density after the self-welding process.
